# Supplementary material for: Apolipoprotein E regulates the maturation of injury-induced adult-born hippocampal neurons following traumatic brain injury
Source: PubMed Central journal article supplement (PMC7051085; doi:10.1371/journal.pone.0229240), 2020-03-02
Supplement: pone.0229240.s003.pdf [file pone.0229240.s003.pdf]

**S3 Table. Summary of statistics for intra-genotype comparisons.** DF = Degrees of Freedom;

iGCL = Inner Granule Cell Layer, oGCL = Outer Granule Cell Layer, in the ipsilateral dentate gyrus; WT = Wild Type. KO = Knockout. The Sholl Analysis represents the average number of intersections in each condition (Column) function of the distance to the soma (Row).

| Table Analyzed | Condition                      | Statistical Test | p value | DF | R <sup>2</sup> | Statistic      |
|----------------|--------------------------------|------------------|---------|----|----------------|----------------|
| 1st Branch     | WT                             | Kruskal-Wallis   | <0.0001 |    |                | H (3) = 18.44  |
|                | WT: iGCL vs oGCL               | Dunn's test      | <0.0001 |    |                |                |
|                | WT: iGCL vs Contralateral      | Dunn's test      | 0.5977  |    |                |                |
|                | WT: oGCL vs Contralateral      | Dunn's test      | 0.0073  |    |                |                |
|                | ApoE KO                        | Kruskal-Wallis   | <0.0001 |    |                | H (3) = 26.38  |
|                | ApoE KO: iGCL vs oGCL          | Dunn's test      | <0.0001 |    |                |                |
|                | ApoE KO: iGCL vs Contralateral | Dunn's test      | 0.6996  |    |                |                |
|                | ApoE KO: oGCL vs Contralateral | Dunn's test      | <0.0001 |    |                |                |
|                | ApoE3                          | Kruskal-Wallis   | 0.004   |    |                | H (3) = 11.05  |
|                | ApoE3: iGCL vs oGCL            | Dunn's test      | 0.0028  |    |                |                |
|                | ApoE3: iGCL vs Contralateral   | Dunn's test      | 0.5781  |    |                |                |
|                | ApoE3: oGCL vs Contralateral   | Dunn's test      | 0.107   |    |                |                |
|                | ApoE4                          | Kruskal-Wallis   | <0.0001 |    |                | H (3) = 21.26  |
|                | ApoE4: iGCL vs oGCL            | Dunn's test      | <0.0001 |    |                |                |
|                | ApoE4: iGCL vs Contralateral   | Dunn's test      | 0.2173  |    |                |                |
|                | ApoE4: oGCL vs Contralateral   | Dunn's test      | 0.0117  |    |                |                |
| Nodes          | WT                             | Kruskal-Wallis   | 0.5029  |    |                | H (3) = 1.375  |
|                | WT: iGCL vs oGCL               | Dunn's test      | 0.8527  |    |                |                |
|                | WT: iGCL vs Contralateral      | Dunn's test      | >0.9999 |    |                |                |
|                | WT: oGCL vs Contralateral      | Dunn's test      | 0.9441  |    |                |                |
|                | ApoE KO                        | Kruskal-Wallis   | 0.2523  |    |                | H (3) = 2.754  |
|                | ApoE KO: iGCL vs oGCL          | Dunn's test      | 0.5608  |    |                |                |
|                | ApoE KO: iGCL vs Contralateral | Dunn's test      | 0.2974  |    |                |                |
|                | ApoE KO: oGCL vs Contralateral | Dunn's test      | 0.1043  |    |                |                |
|                | ApoE3                          | Kruskal-Wallis   | 0.6295  |    |                | H (3) = 0.9257 |
|                | ApoE3: iGCL vs oGCL            | Dunn's test      | >0.9999 |    |                |                |
|                | ApoE3: iGCL vs Contralateral   | Dunn's test      | >0.9999 |    |                |                |
|                | ApoE3: oGCL vs Contralateral   | Dunn's test      | >0.9999 |    |                |                |
|                | ApoE4                          | Kruskal-Wallis   | 0.1277  |    |                | H (3) = 4.116  |
|                | ApoE4: iGCL vs oGCL            | Dunn's test      | 0.1914  |    |                |                |
|                | ApoE4: iGCL vs Contralateral   | Dunn's test      | >0.9999 |    |                |                |
|                | ApoE4: oGCL vs Contralateral   | Dunn's test      | 0.2327  |    |                |                |
| Total Length   | WT                             | Kruskal-Wallis   | 0.1369  |    |                | H (3) = 0.1369 |
|                | WT: iGCL vs oGCL               | Dunn's test      | 0.187   |    |                |                |

|                |                                   |                |                                                                                                                                                                                                    |                |                      |
|----------------|-----------------------------------|----------------|----------------------------------------------------------------------------------------------------------------------------------------------------------------------------------------------------|----------------|----------------------|
|                | WT: iGCL vs Contralateral         | Dunn's test    | >0.9999                                                                                                                                                                                            |                |                      |
|                | WT: oGCL vs Contralateral         | Dunn's test    | 0.2969                                                                                                                                                                                             |                |                      |
|                | ApoE KO                           | Kruskal-Wallis | 0.0016                                                                                                                                                                                             | H (3) = 12.92  |                      |
|                | ApoE KO: iGCL vs oGCL             | Dunn's test    | 0.0014                                                                                                                                                                                             |                |                      |
|                | ApoE KO: iGCL vs Contralateral    | Dunn's test    | 0.8471                                                                                                                                                                                             |                |                      |
|                | ApoE KO: oGCL vs Contralateral    | Dunn's test    | 0.0019                                                                                                                                                                                             |                |                      |
|                | ApoE3                             | Kruskal-Wallis | 0.1239                                                                                                                                                                                             | H (3) = 0.1239 |                      |
|                | ApoE3: iGCL vs oGCL               | Dunn's test    | 0.1563                                                                                                                                                                                             |                |                      |
|                | ApoE3: iGCL vs Contralateral      | Dunn's test    | 0.0497                                                                                                                                                                                             |                |                      |
|                | ApoE3: oGCL vs Contralateral      | Dunn's test    | 0.6817                                                                                                                                                                                             |                |                      |
|                | ApoE4                             | Kruskal-Wallis | 0.0055                                                                                                                                                                                             | H (3) = 10.42  |                      |
|                | ApoE4: iGCL vs oGCL               | Dunn's test    | 0.1009                                                                                                                                                                                             |                |                      |
|                | ApoE4: iGCL vs Contralateral      | Dunn's test    | 0.5863                                                                                                                                                                                             |                |                      |
|                | ApoE4: oGCL vs Contralateral      | Dunn's test    | 0.0039                                                                                                                                                                                             |                |                      |
| Angle          | WT                                | Kruskal-Wallis | 0.0157                                                                                                                                                                                             | H (3) = 0.0157 |                      |
|                | WT: iGCL vs oGCL                  | Dunn's test    | 0.0134                                                                                                                                                                                             |                |                      |
|                | WT: iGCL vs Contralateral         | Dunn's test    | 0.2533                                                                                                                                                                                             |                |                      |
|                | WT: oGCL vs Contralateral         | Dunn's test    | 0.6427                                                                                                                                                                                             |                |                      |
|                | ApoE KO                           | Kruskal-Wallis | 0.048                                                                                                                                                                                              | H (3) = 6.075  |                      |
|                | ApoE KO: iGCL vs oGCL             | Dunn's test    | 0.015                                                                                                                                                                                              |                |                      |
|                | ApoE KO: iGCL vs Contralateral    | Dunn's test    | 0.371                                                                                                                                                                                              |                |                      |
|                | ApoE KO: oGCL vs Contralateral    | Dunn's test    | 0.1016                                                                                                                                                                                             |                |                      |
|                | ApoE3                             | Kruskal-Wallis | 0.0157                                                                                                                                                                                             | H (3) = 8.303  |                      |
|                | ApoE3: iGCL vs oGCL               | Dunn's test    | 0.0149                                                                                                                                                                                             |                |                      |
|                | ApoE3: iGCL vs Contralateral      | Dunn's test    | 0.1807                                                                                                                                                                                             |                |                      |
|                | ApoE3: oGCL vs Contralateral      | Dunn's test    | 0.8697                                                                                                                                                                                             |                |                      |
|                | ApoE4                             | Kruskal-Wallis | 0.0008                                                                                                                                                                                             | H (3) = 14.34  |                      |
|                | ApoE4: iGCL vs oGCL               | Dunn's test    | 0.0005                                                                                                                                                                                             |                |                      |
|                | ApoE4: iGCL vs Contralateral      | Dunn's test    | 0.4125                                                                                                                                                                                             |                |                      |
|                | ApoE4: oGCL vs Contralateral      | Dunn's test    | 0.0546                                                                                                                                                                                             |                |                      |
| Sholl Analysis |                                   | Two-way ANOVA  |                                                                                                                                                                                                    |                |                      |
|                | WT: iGCL vs oGCL vs Contralateral | Interaction    | <0.0001                                                                                                                                                                                            | 56             | F (56, 4727) = 2.651 |
|                |                                   | Row Factor     | <0.0001                                                                                                                                                                                            | 28             | F (28, 4727) = 220.5 |
|                |                                   | Column Factor  | <0.0001                                                                                                                                                                                            | 2              | F (2, 4727) = 12.95  |
|                | WT: iGCL vs Contralateral         | Fisher's LSD   | p < 0.05, 0.05, 0.01 for each 10µm increment between 30 and 50µm from the soma, p < 0.05 at 110µm from the soma, p < 0.05, 0.01, 0.001 for each 10µm increment between 130 and 150µm from the soma |                |                      |

|                                        |               |                                                                                                                                                                                                                                                                  |                     |                      |
|----------------------------------------|---------------|------------------------------------------------------------------------------------------------------------------------------------------------------------------------------------------------------------------------------------------------------------------|---------------------|----------------------|
| WT: oGCL vs Contralateral              | Fisher's LSD  | p < 0.05, 0.05 at 110 and 120µm from the soma, p < 0.05, 0.05 at 190 and 200µm from the soma                                                                                                                                                                     |                     |                      |
| WT: iGCL vs oGCL                       | Fisher's LSD  | p < 0.01, 0.01, 0.01, 0.05 for each 10µm increment between 30µm and 60µm from the soma, p < 0.01, 0.001, 0.001, 0.001, 0.01, 0.001, 0.01, 0.001, 0.01, 0.01 for each 10µm increment between 100 and 190µm from the soma                                          |                     |                      |
| ApoE KO: iGCL vs oGCL vs Contralateral | Two-way ANOVA |                                                                                                                                                                                                                                                                  |                     |                      |
|                                        | Interaction   | <0.0001                                                                                                                                                                                                                                                          | 56                  | F (56, 6815) = 3.696 |
|                                        | Row Factor    | <0.0001                                                                                                                                                                                                                                                          | 28                  | F (28, 6815) = 249.7 |
| Column Factor                          | <0.0001       | 2                                                                                                                                                                                                                                                                | F (2, 6815) = 30.67 |                      |
| ApoE KO: iGCL vs Contralateral         | Fisher's LSD  | p < 0.01, 0.05 and 0.01 for each 10µm increment between 200µm and 220µm from the soma                                                                                                                                                                            |                     |                      |
| ApoE KO: oGCL vs Contralateral         | Fisher's LSD  | p < 0.001, 0.001, 0.01 for each 10µm increment between 40µm and 60µm from the soma; p < 0.01, 0.05, 0.05, 0.05, 0.05, 0.05, 0.01, 0.01, 0.001, 0.01 and 0.05 for each 10µm increment between 100µm and 210µm from the soma                                       |                     |                      |
| ApoE KO: iGCL vs oGCL                  | Fisher's LSD  | p < 0.01, 0.01, 0.05 for each 10µm increment between 40µm and 60µm from the soma; p < 0.05, 0.05, 0.01, 0.001, 0.01, 0.001, 0.01, 0.001, 0.001, 0.001, 0.001, 0.001, 0.001, 0.001, 0.001, and 0.01 for each 10µm increment between 100µm and 230µm from the soma |                     |                      |
| ApoE3: iGCL vs oGCL vs Contralateral   | Two-way ANOVA |                                                                                                                                                                                                                                                                  |                     |                      |
|                                        | Interaction   | <0.0001                                                                                                                                                                                                                                                          | 54                  | F (54, 6188) = 3.038 |
|                                        | Row Factor    | <0.0001                                                                                                                                                                                                                                                          | 27                  | F (27, 6188) = 347.4 |
| Column Factor                          | <0.0001       | 2                                                                                                                                                                                                                                                                | F (2, 6188) = 24.98 |                      |
| ApoE3: iGCL vs Contralateral           | Fisher's LSD  | p < 0.05 at 30 and 50µm from the soma; p < 0.05 and 0.05 for each 10µm increment between 100µm and 110µm from the soma; p < 0.05, 0.01, 0.001, 0.001, 0.001, 0.001, 0.001, 0.001, 0.001 and 0.05 for each 10µm increment between 130µm and 210µm from the soma   |                     |                      |

|                                      |               |                                                                                                                                                                                                                                                                                                     |    |                      |
|--------------------------------------|---------------|-----------------------------------------------------------------------------------------------------------------------------------------------------------------------------------------------------------------------------------------------------------------------------------------------------|----|----------------------|
| ApoE3: oGCL vs Contralateral         | Fisher's LSD  | p < 0.05 at 40µm from the soma                                                                                                                                                                                                                                                                      |    |                      |
| ApoE3: iGCL vs oGCL                  | Fisher's LSD  | p < 0.001, 0.001, 0.001 and 0.01 for each 10µm increment between 30µm and 60µm from the soma; p < 0.05 and 0.05 for each 10µm increment between 110µm and 120µm from the soma; p < 0.05, 0.05, 0.01, 0.01, 0.001, 0.01, 0.01 and 0.05 for each 10µm increment between 140µm and 210µm from the soma |    |                      |
| ApoE4: iGCL vs oGCL vs Contralateral | Two-way ANOVA |                                                                                                                                                                                                                                                                                                     |    |                      |
|                                      | Interaction   | <0.0001                                                                                                                                                                                                                                                                                             | 54 | F (54, 7084) = 4.115 |
|                                      | Row Factor    | <0.0001                                                                                                                                                                                                                                                                                             | 27 | F (27, 7084) = 223.7 |
|                                      | Column Factor | <0.0001                                                                                                                                                                                                                                                                                             | 2  | F (2, 7084) = 30.83  |
| ApoE4: iGCL vs Contralateral         | Fisher's LSD  | p < 0.05 at 120µm from the soma                                                                                                                                                                                                                                                                     |    |                      |
| ApoE4: oGCL vs Contralateral         | Fisher's LSD  | p < 0.001 and 0.01 for each 10µm increment between 40µm and 50µm from the soma; p < 0.05, 0.05, 0.01, 0.01, 0.001, 0.001, 0.001, 0.001, 0.001, 0.01 and 0.05 for each 10µm increment between 110µm and 220µm from the soma                                                                          |    |                      |
| ApoE4: iGCL vs oGCL                  | Fisher's LSD  | p < 0.05, 0.001, 0.001 and 0.01 for each 10µm increment between 30µm and 60µm from the soma; p < 0.01, 0.01, 0.001, 0.001, 0.001, 0.001, 0.001, 0.01 and 0.05 for each 10µm increment between 150µm and 230µm from the soma                                                                         |    |                      |
